# Supplementary material for: Acetylene hydrochlorination over boron-doped Pd/HY zeolite catalysts
Source: Royal Society of Chemistry journal article supplement (doi:10.1039/c9ra05576b), 2019-01-01
Supplement: c9ra05576b1.pdf [file c9ra05576b1.pdf]

**Supplementary Information for:**

**Acetylene hydrochlorination over the boron-doped Pd/HY zeolite catalysts**

Lu Wang<sup>\*ab</sup>, LiZhen Lian<sup>a</sup>, Haijun Yan<sup>a</sup>, Feng Wang<sup>a</sup>, Jide Wang<sup>\*a</sup>, Chao Yang<sup>a</sup> and Lida Ma<sup>b</sup>

<sup>a</sup> Key Laboratory of Oil and Gas Fine Chemicals of Education and Xinjiang Uyghur Autonomous Region, College of Chemistry and Chemical Engineering, Xinjiang University, Urumqi, P.R. China, 830046.

<sup>b</sup> Xinjiang De'an Environmental Protection Technology Co. Ltd, Urumqi, P.R. China, 830026.

**\*Corresponding author:** Lu Wang, Jide Wang

**E-mail:** wanglu\_4951@163.com

awangjd@126.com

**Tel:** +86-0991-8581018

**Fax:** +86-0991-8581018

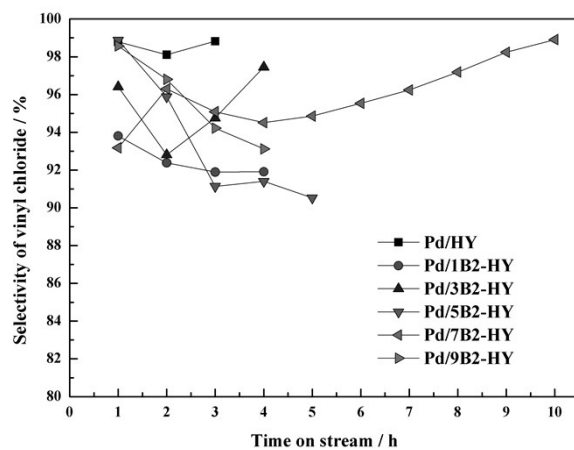

**Fig.S1** The selectivity to vinyl chloride over Pd-based catalysts, Reaction condition: Temperature = 160 °C, feed volume ratio  $V_{\text{HCl}}: V_{\text{C}_2\text{H}_2} = 1.25$ ,  $\text{C}_2\text{H}_2$  GHSV = 110  $\text{h}^{-1}$ .

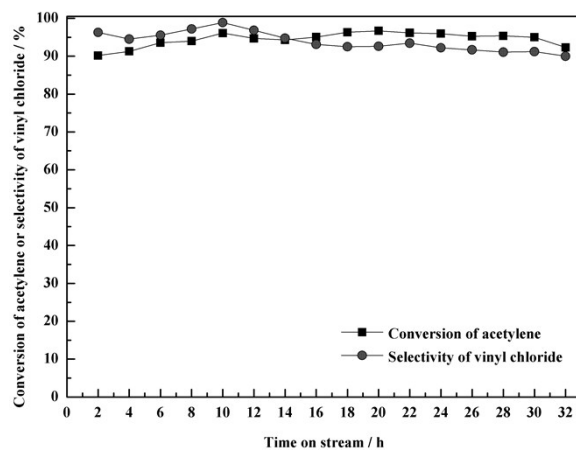

**Fig.S2** The catalytic performance of the Pd/7B2-HY catalysts, Reaction condition: Temperature = 160 °C, feed volume ratio  $V_{\text{HCl}}:V_{\text{C}_2\text{H}_2}= 1.25$ ,  $\text{C}_2\text{H}_2$  GHSV = 110 h<sup>-1</sup>.

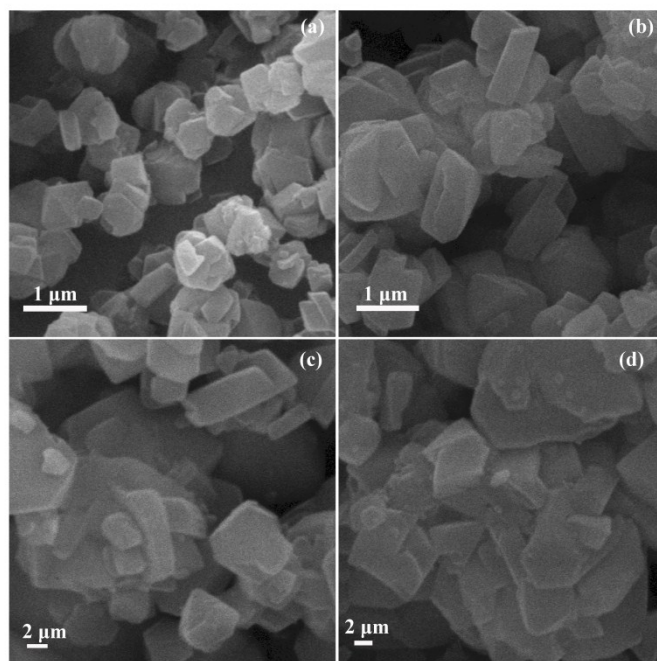

**Fig.S3** SEM images of HY (a), 7B2-HY (b), fresh Pd/7B2-HY (c) and used Pd/7B2-HY (d).

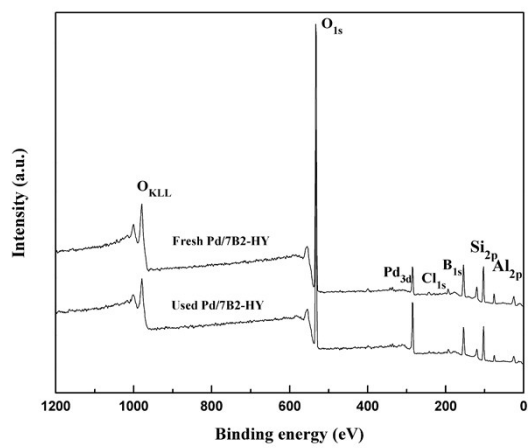

**Fig.S4** Wide scan spectra of XPS over fresh and used Pd/7B2-HY catalysts.

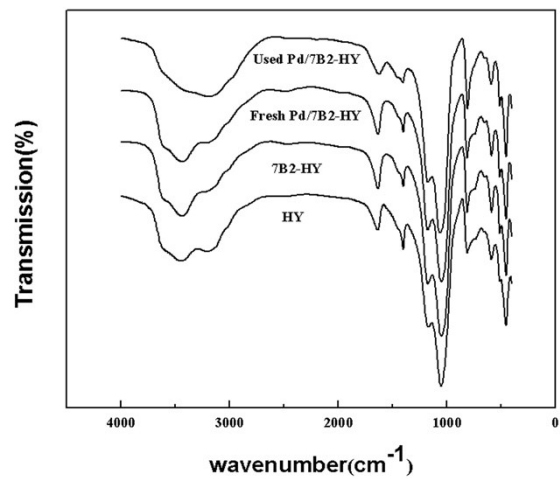

Fig.S5 NH<sub>3</sub>-TPD profiles of the fresh Pd-based catalysts.

**Table.S1** EDS analysis of samples

| Samples         | C/<br>wt% | Si/<br>wt% | Al/<br>wt% | O/<br>wt% | Cl/<br>wt% | B/<br>wt% | Pd/<br>wt% |
|-----------------|-----------|------------|------------|-----------|------------|-----------|------------|
| HY              | 0         | 31.55      | 7.64       | 59.88     | 0.93       | 0         | 0          |
| 7B2-HY          | 0         | 34.64      | 6.89       | 55.35     | 1.02       | 2.10      | 0          |
| Fresh Pd/7B2-HY | 0         | 33.62      | 5.10       | 56.73     | 1.95       | 2.09      | 0.51       |
| Used Pd/7B2-HY  | 12.69     | 29.67      | 2.54       | 52.75     | 2.18       | 0         | 0.17       |

**Table.S2** The results of GC-MS.

| <b>Compounds</b>   | <b>Percentage by mass<br/>(Pd/HY)</b> | <b>Percentage by mass<br/>(Pd/7B2-HY)</b> |
|--------------------|---------------------------------------|-------------------------------------------|
| Vinyl chloride     | 0.02%                                 | 0.30%                                     |
| Benzene            | 0.09%                                 | 0.30%                                     |
| Chlorobenzene      | 0.08%                                 | 0.02%                                     |
| 1,1-dichloroethane | 0.04%                                 | 0.40%                                     |
| 1-chlorobutylene   | 0.02%                                 | 0.02%                                     |

Analysis conditions are as follows:

Agilent 7890A/5975C GC-MS; chromatographic column J&W 122-1364: 60 m × 0.25 mm × 1.4 μm; inlet temperature, 250 °C; split ratio, 5.0:1; ion source, EI source; ion source temperature, 230 °C; quadrupole temperature, 150 °C; electron energy, 70 eV; interface temperature, 280 °C.
